# Supplementary material
Source: PubMed Central journal article supplement (PMC6711603)
Supplement: NIHMS845078-supplement-1.pdf [file NIHMS845078-supplement-1.pdf]

## **SUPPLEMENTARY FIGURES AND TABLES**

Tongwu Zhang *et al.*

*SDHD* promoter mutations ablate GABP transcription factor binding in melanoma

**Supplementary Figure 1. Confirmation of the recurrent C524, C541 and C544 *SDHD* promoter mutations in melanoma cell lines.** Sanger sequencing traces for both forward and reverse reads verify all three recurrent *SDHD* promoter mutation in melanoma cell lines UACC952, C021 and C077.

# Fig S1

**UACC952**

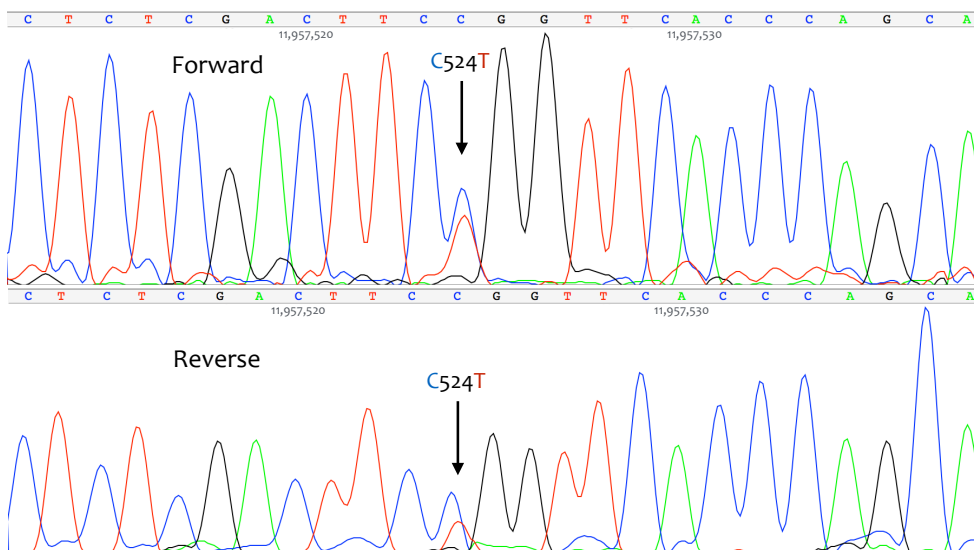

**C021**

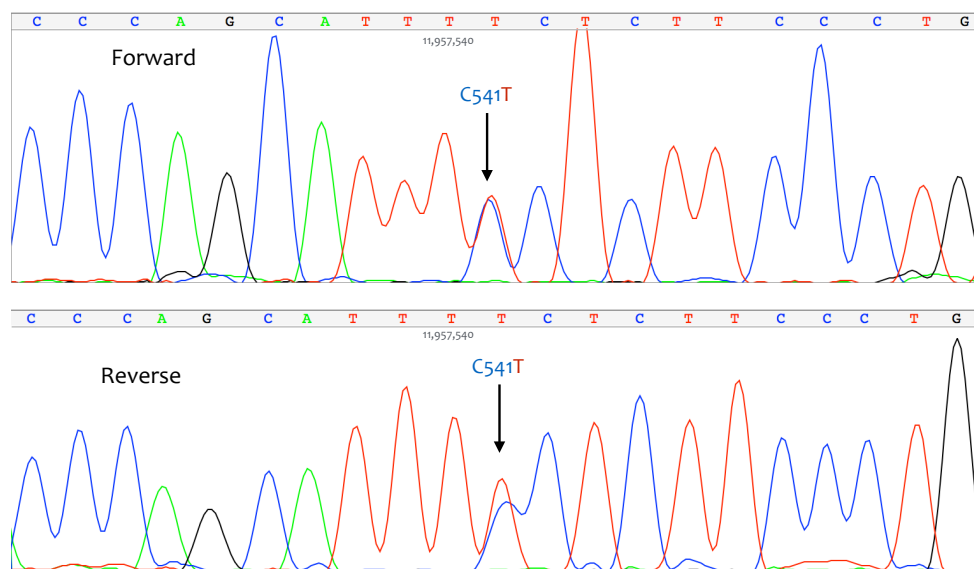

**C077**

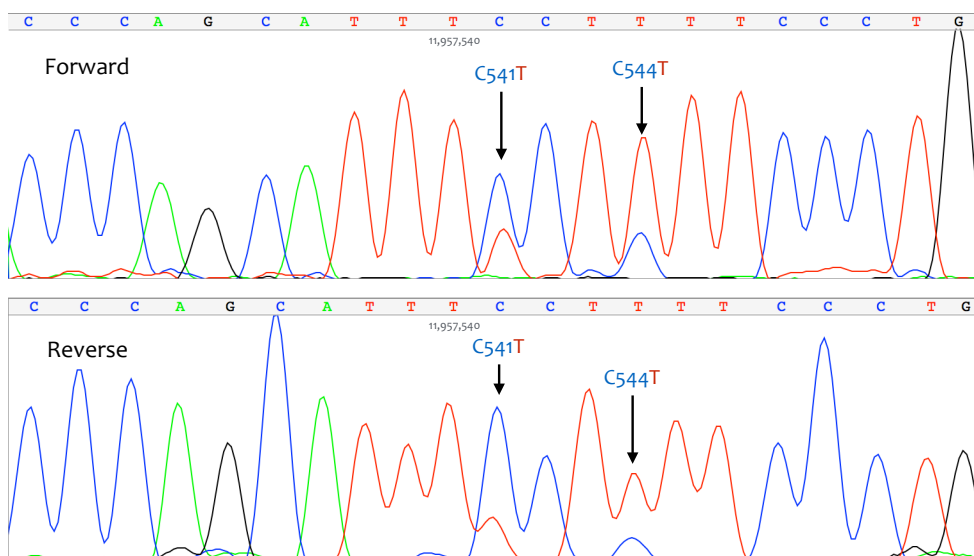

**Supplementary Figure 2.** *SDHD* expression difference in melanomas harboring promoter mutations compared to *SDHD* wild-type samples. *SDHD* promoter-mutant samples are grouped according to mutation. *SDHD* expression was significantly decreased in the set of tumors harboring the *SDHD* C523T promoter mutation (one-tailed student's t-test,  $P = 0.0135$ ) compared to wild-type samples. "Other Hotspot Mutation" includes the *SDHD* promoter mutations C532A, C541T, C544T and C548T, while "Non-Hotspot Mutation" includes *SDHD* promoter mutations C515T, A530G, C531T, C547T and C549T. Copy number for each sample as predicted by GISTIC is denoted with different coloring (Purple/-2: homozygous deletion; Red/-1: shallow deletion; Green/0: copy-neutral; Blue/1: copy gain; Black/NA: not assessable).

# Fig S2

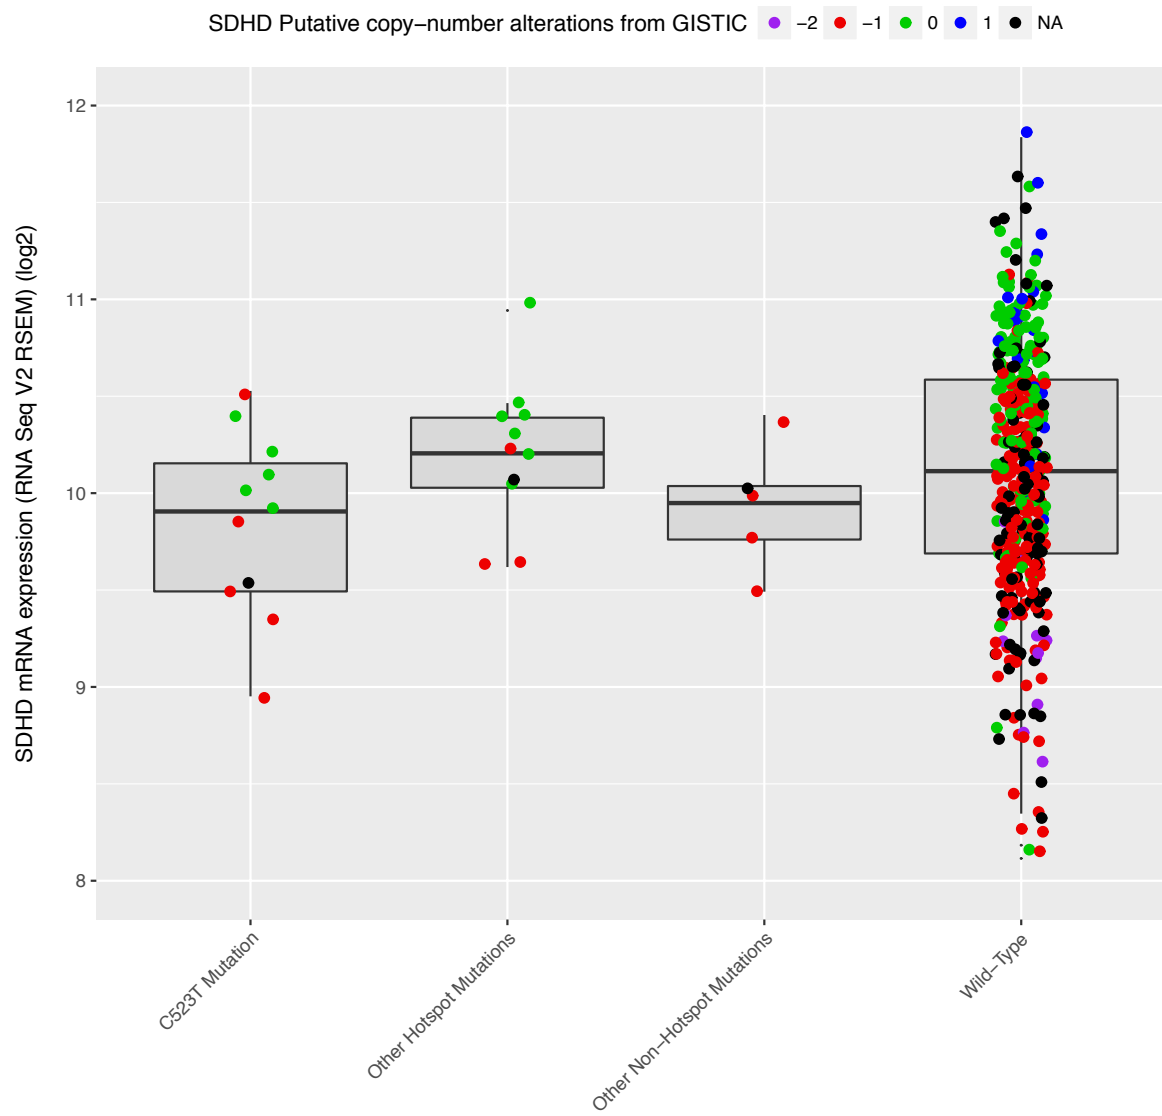

**Supplementary Figure 3. *SDHD* promoter activity is significantly decreased by the C541T and C544T *SDHD* hotspot mutations in multiple melanoma cell lines.** A 163 bp fragment from the wild-type *SDHD* promoter sequence surrounding hotspot mutations significantly enhance luciferase reporter expression relative to vector control, whereas the same fragment containing hotspot mutations decrease enhancer activity relative to the wild-type sequence. Luciferase activity was measured 24hr after transfection and normalized to Renilla luciferase readings. Fold change over minimal promoter control (vector only) is plotted as relative luciferase activity. The experiment was performed four times with triplicates for each. Stars denote significant differences in luciferase activity by two-tailed student's t-test (\*: *P*-value <0.05; \*\*: *P*-value <0.01; \*\*\*: *P*-value <0.001).

**Fig S3**

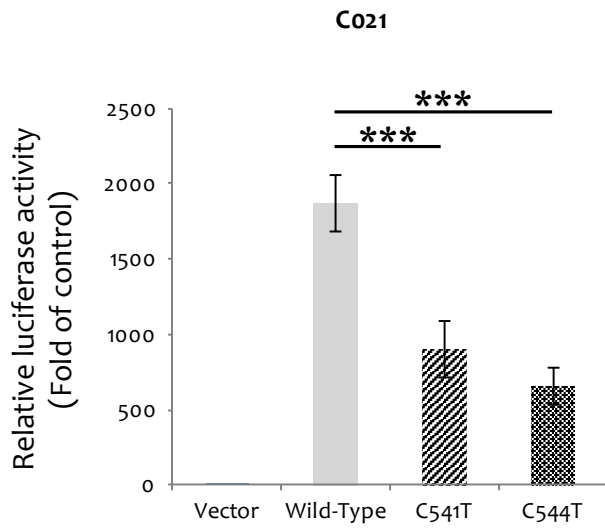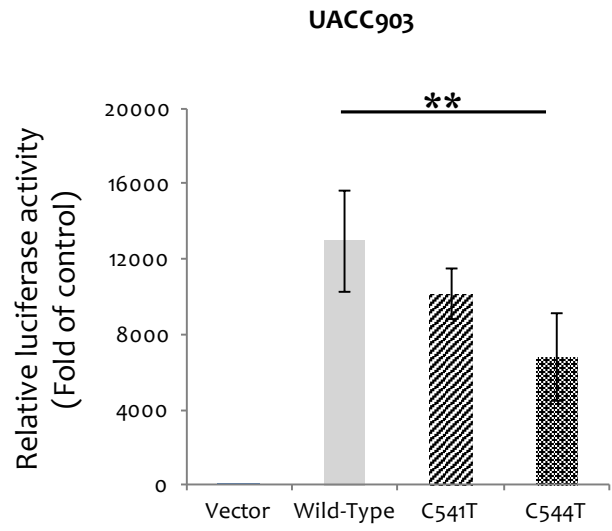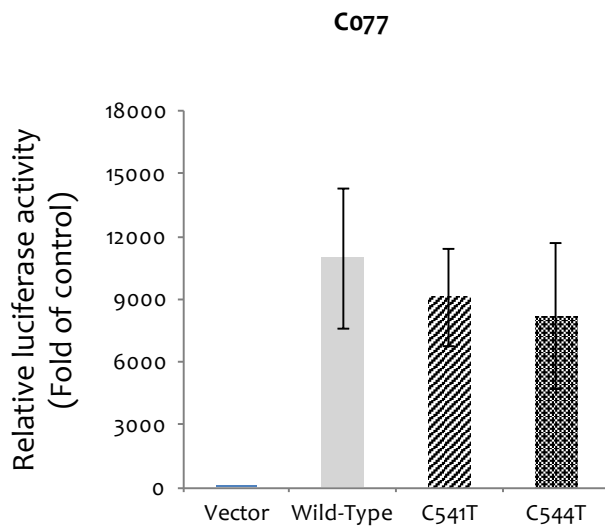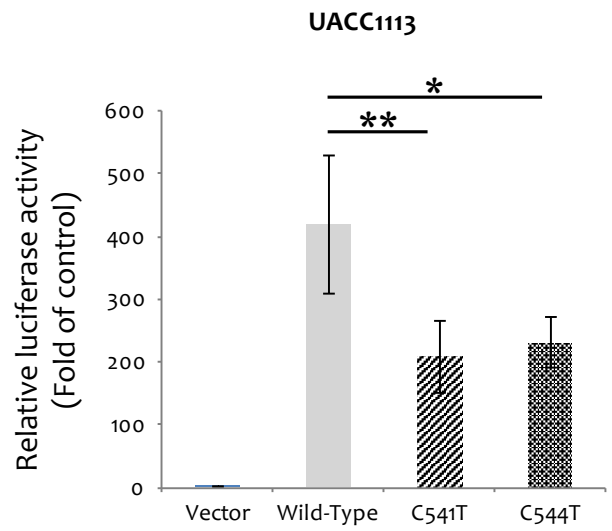

**Supplementary Figure 4. Predicting *SDHD* promoter mutation effects on transcription factor binding sites.** Data are shown for **(A)** C541T and **(B)** C544T. Genomic sequence and coordinates are at the bottom of the display; the positions of the matches represented (light blue boxes). The position of the mutations within the motif is indicated by a red-bounded box, with the alternate allele below in red font as on the motif logo position bar above. The motif logos generated from *motifstack* are shown above using the color conventions of the genomic sequence below. Predicted transcription factor name and change score (Alterscore-Refscore) are shown to the right of each motif, and the transcription factor with the strongest score is highlighted in red. Mutations leading to disruption of transcription factor binding sites have negative change scores, while those creating new transcription factor binding sites have positive change scores.



# Fig S4

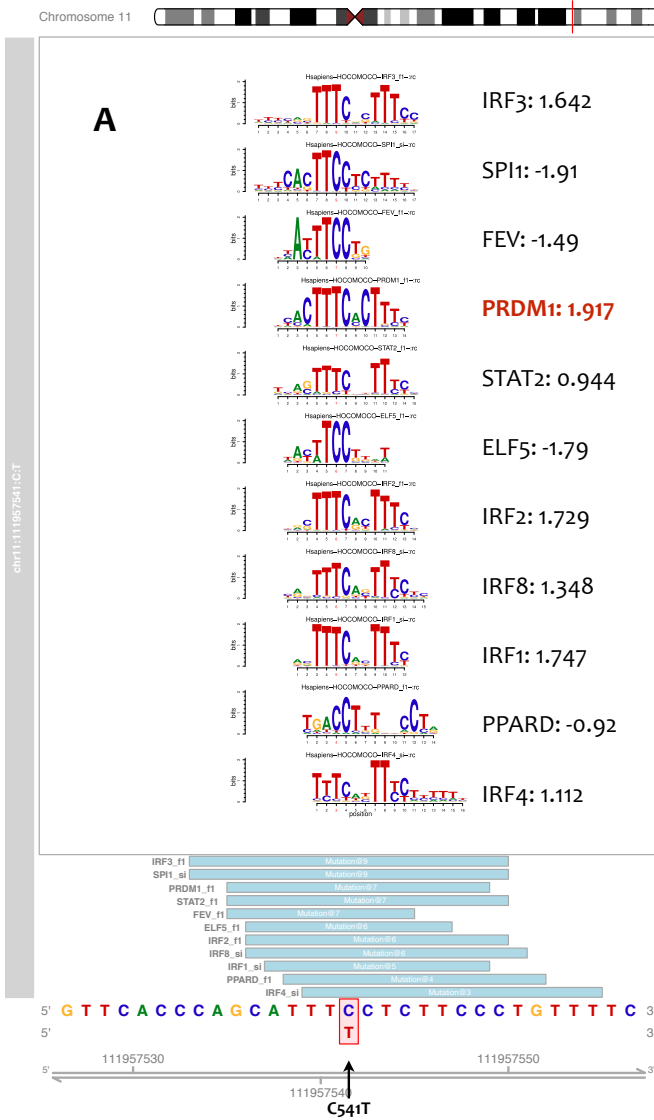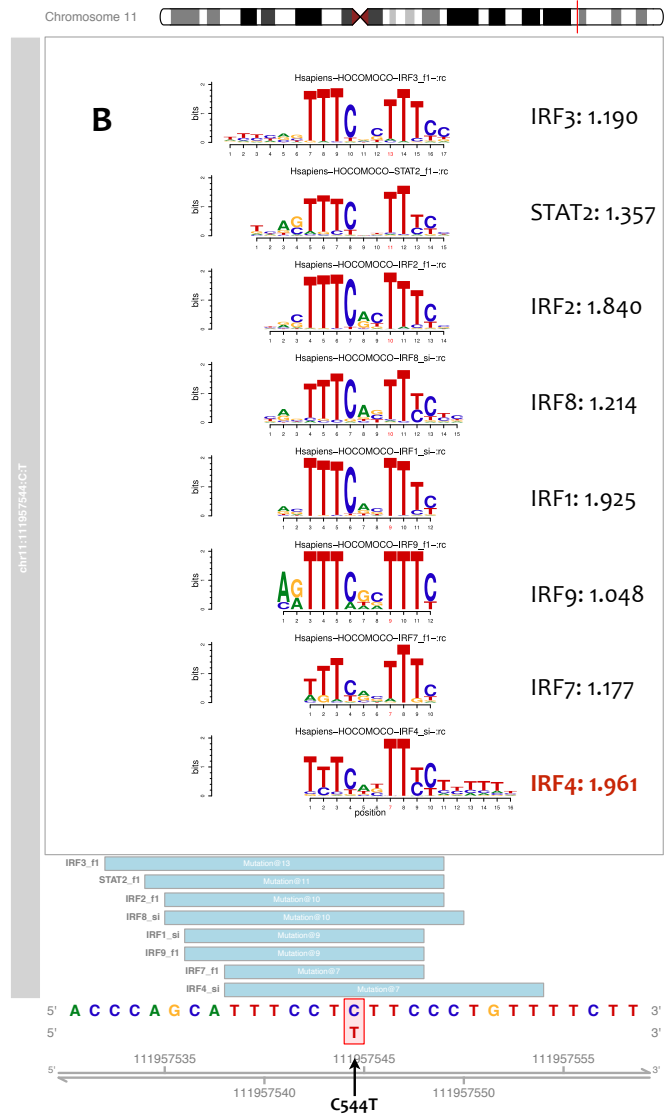

**Supplementary Figure 5. mRNA expression correlation between *SDHD* and multiple ETS transcription factors in TCGA SKCM samples harboring the *SDHD* C523T promoter mutation.** Pearson correlation of mRNA expression between *SDHD* and 16 transcription factors with consensus motifs altered by the C523T mutation as predicted by *motifbreakR*. Significant Pearson correlations are highlighted with one or more star (\*: *P*-value <0.05; \*\*: *P*-value <0.01; \*\*\*: *P*-value <0.001).

# Fig S5

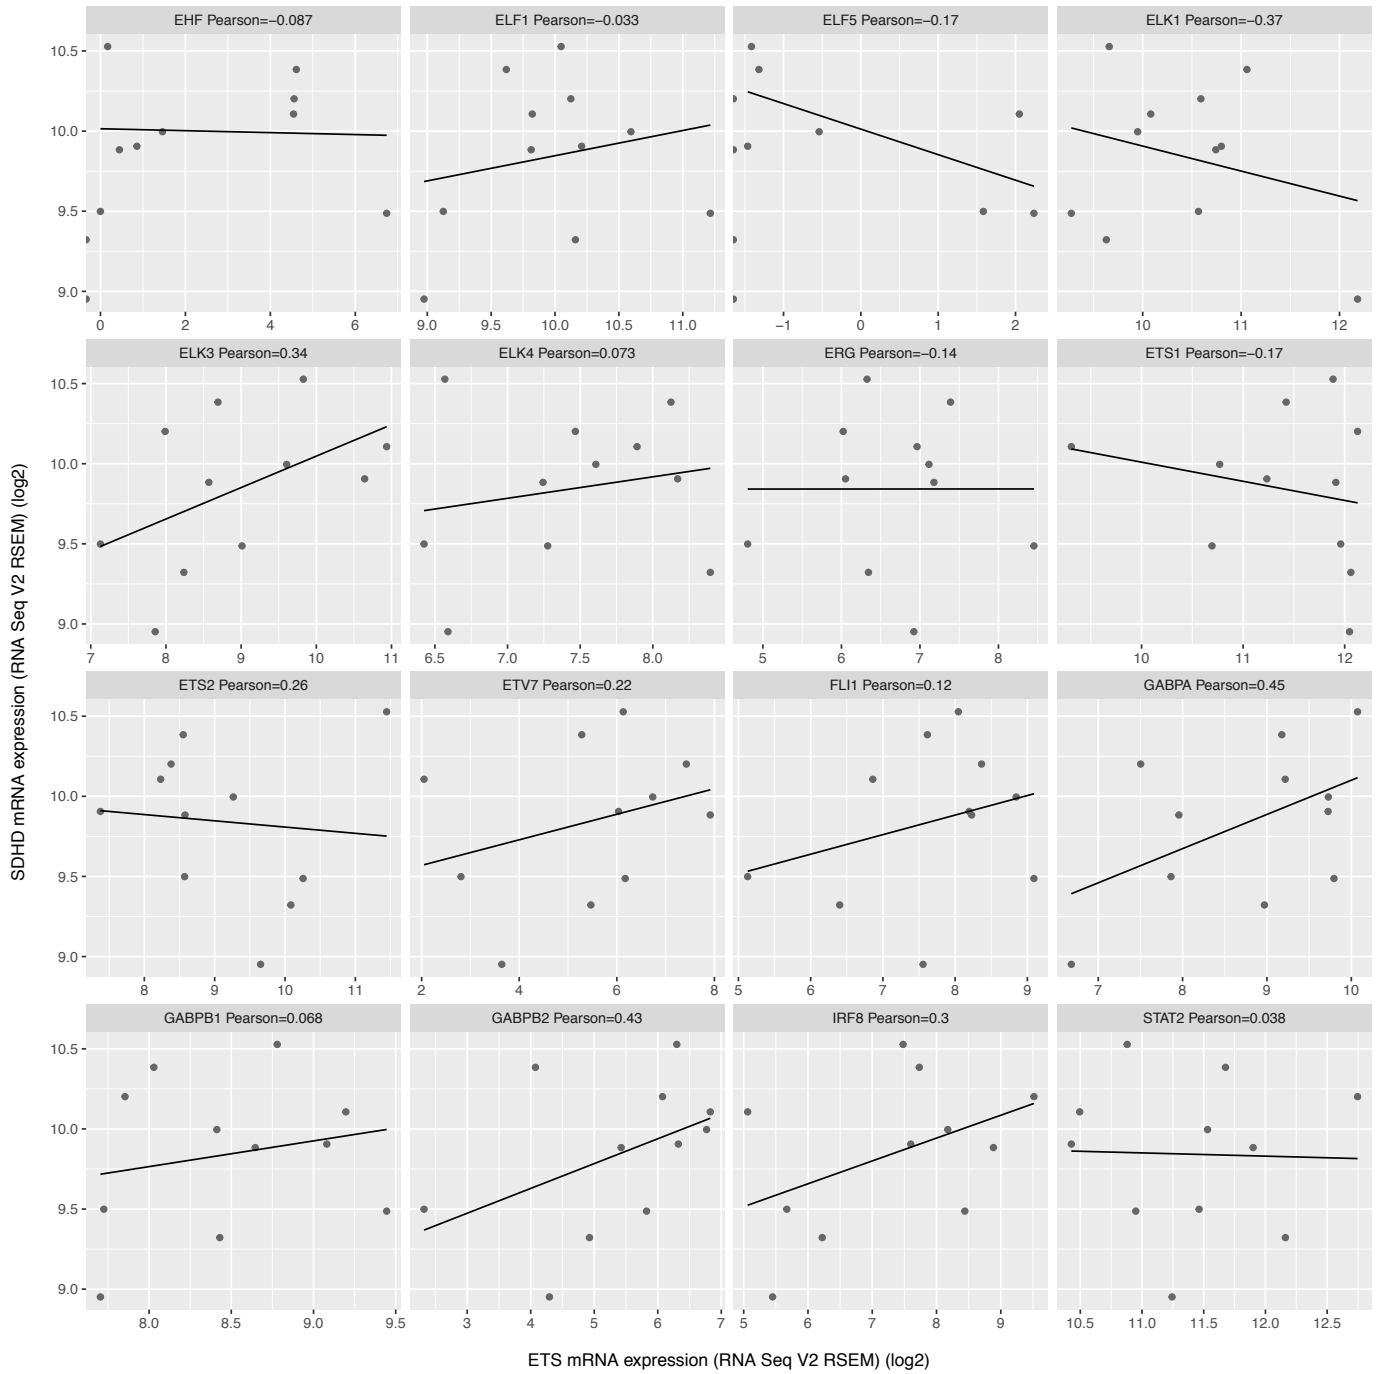

**Supplementary Figure 6. Band-shift experiments indicate wild-type specific binding of ELF1 to the *SDHD* promoter.** (A) Band-shift analysis with the C523T *SDHD* promoter mutation oligo and recombinant human ELF1 protein. (B) Band-shift analysis with the C524T *SDHD* promoter mutation oligo and recombinant human ELF1 protein. (C) Band-shift analysis with the C541T *SDHD* promoter mutation oligo and recombinant human ELF1 protein. (D) Band-shift analysis with the C544T *SDHD* promoter mutation oligo and recombinant human ELF1 protein.

**Fig S6**

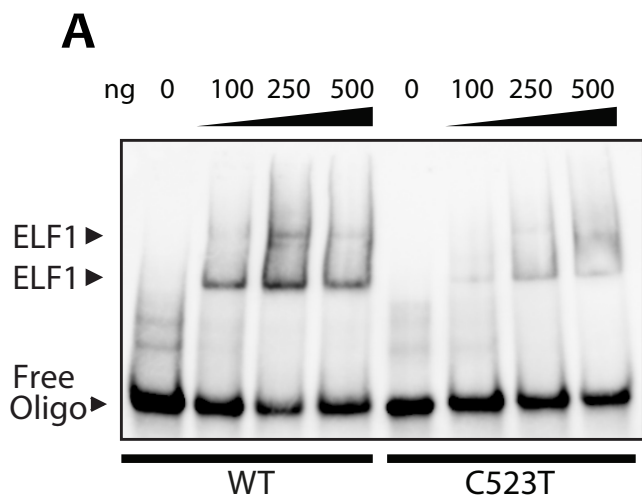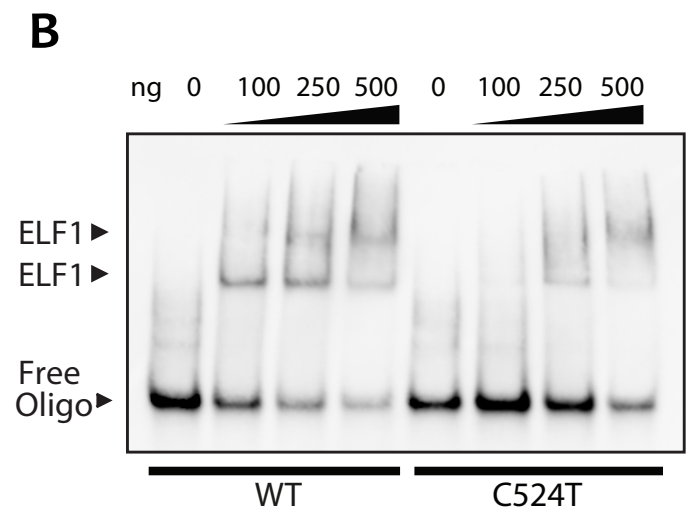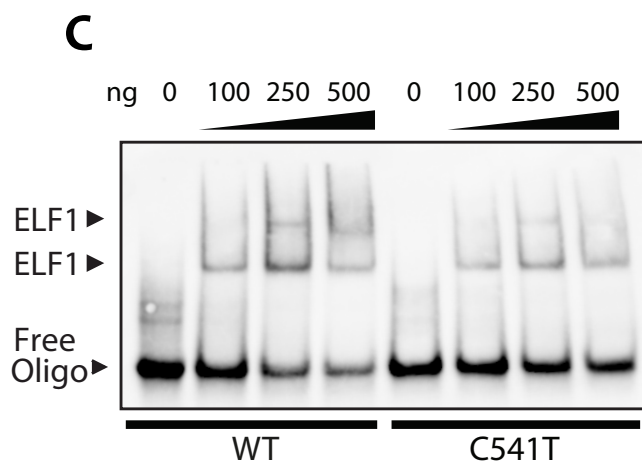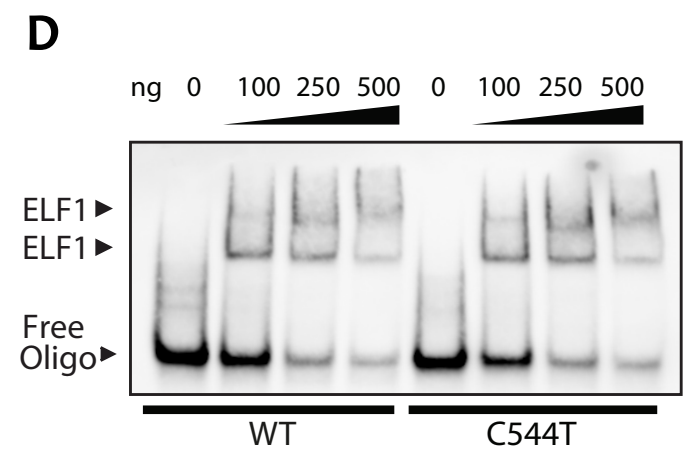

**Supplementary Figure 7. siRNA-mediated knockdown of *ELF1* does not lead to decreased *SDHD* expression in melanoma cells.** Control siRNA or siRNAs targeting *ELF1* were transfected into cells, and expression of *ELF1* and *SDHD* were assayed by Taqman assays at day 5 following transfection. Data are shown for two melanoma cell lines, (A) UACC903 and (B) UACC1113.

**Fig S7**

**A**

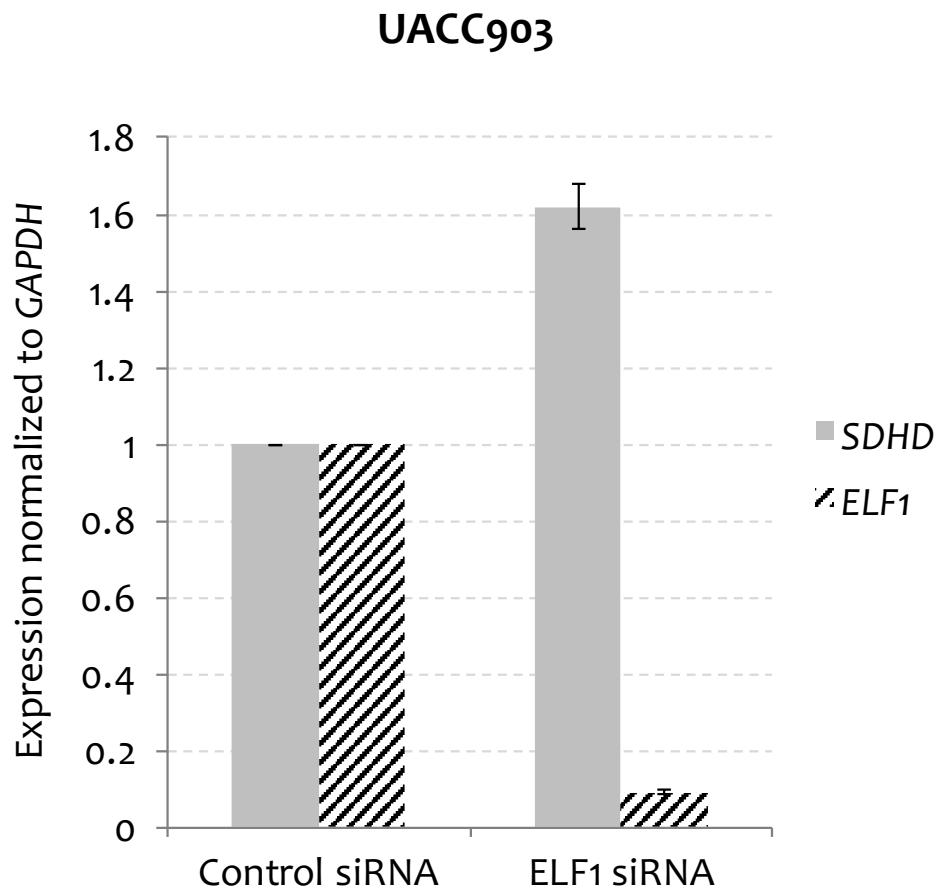

**B**

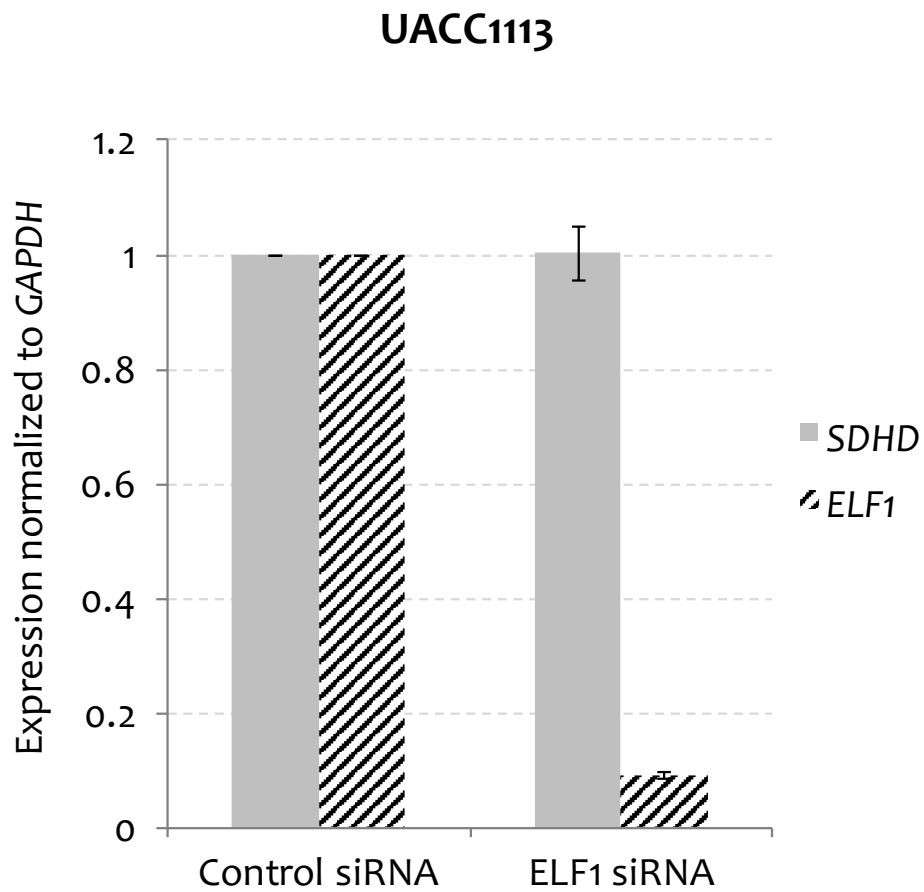

**Supplementary Figure 8. Effects of siRNA-mediated knockdown of *PRDMI* or *IRF4* on *SDHD* expression and *SDHD* promoter activity in melanoma cells.** (A) Depletion of *PRDMI* or *IRF4* resulted in varied levels of reduction in *SDHD* expression across melanoma cell lines (UACC903, UACC1113, and C021). Control siRNA or siRNAs targeting *PRDMI* or *IRF4* were transfected into cells, and expression of *PRDMI*, *IRF4* and *SDHD* were assayed by Taqman assays at day five following transfection. (B) siRNA-mediated depletion of *PRDMI* or *IRF4* do not dramatically alter wild-type or mutant *SDHD* promoter activity in an allele-specific manner. A 163-bp fragment from the wild-type *SDHD* promoter sequence surrounding hotspot mutations significantly enhances luciferase reporter expression relative to vector control. The same fragment containing hotspot mutations results in decreased promoter activity relative to the wild-type sequence. While depletion of *PRDMI* or *IRF4* do broadly result in small alterations in reporter activity, neither alters reporter expression of these constructs in an allele-specific manner. Fold change over minimal promoter control (vector only) is plotted as relative luciferase activity. The experiment was performed four times with triplicates for each.



Fig S8

**A**

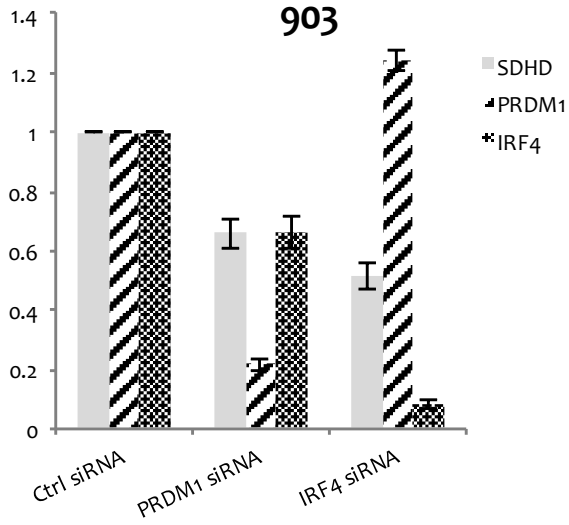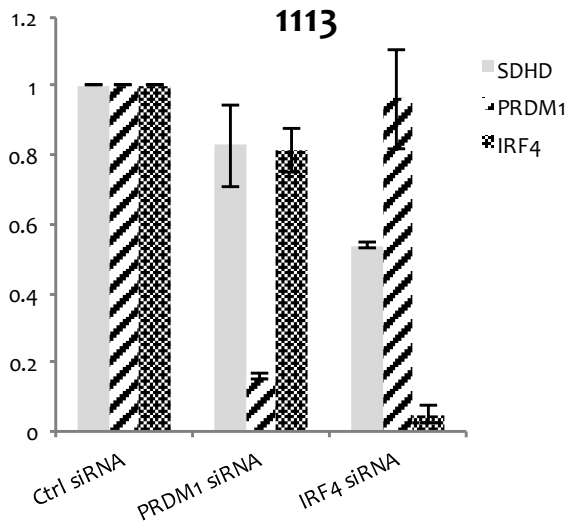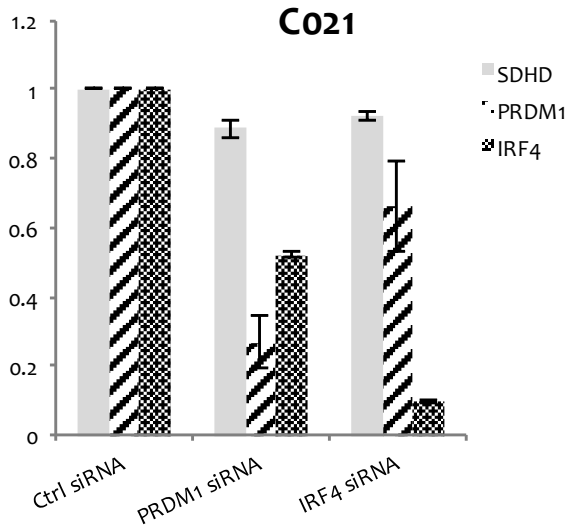

**B**

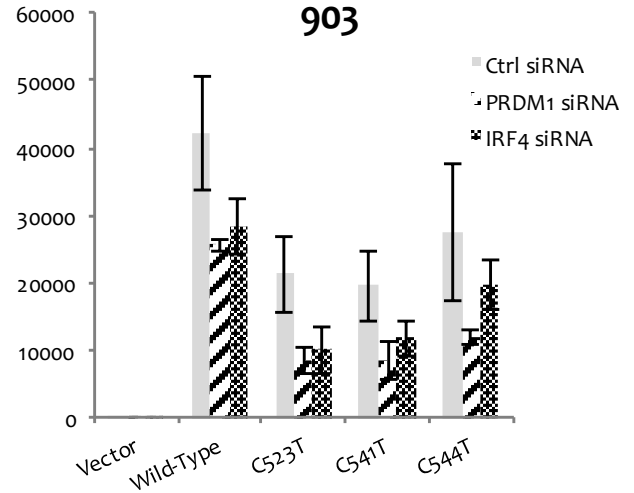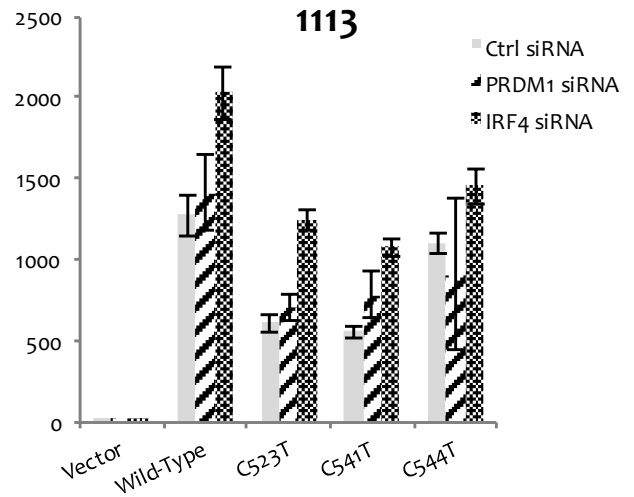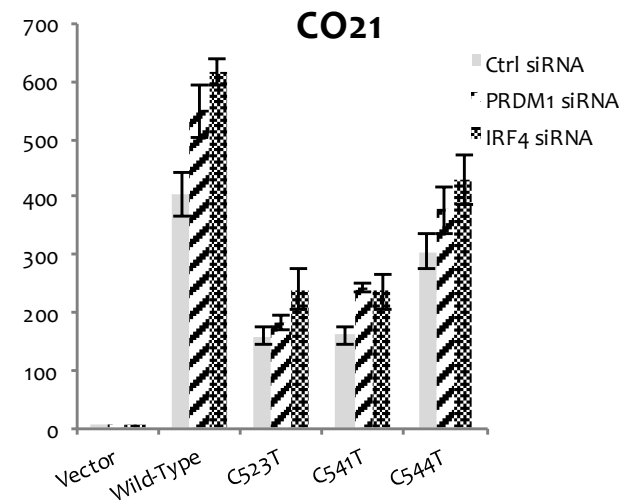

**Supplementary Table 1. *SDHD* promoter mutations identified in melanoma tumors datasets (TCGA, Broad and Yale) and melanoma cell lines.**

**S1 Table. *SDHD* promoter mutations identified in melanoma tumors datasets (TCGA, Broad and Yale) and melanoma cell lines.**

| Chromosome | Location  | Ref | Alt | Sample       | Source     | Ref_bases_num | Alt_bases_num |
|------------|-----------|-----|-----|--------------|------------|---------------|---------------|
| 11         | 111957518 | G   | A   | Ma-Mel-114   | Broad      | 24            | 16            |
| 11         | 111957527 | T   | C   | Ma-Mel-35    | Broad      | 12            | 3             |
| 11         | 111957529 | C   | T   | JWCI-WGS-21  | Broad      | 0             | 7             |
| 11         | 111957547 | C   | T   | ME014        | Broad      | 20            | 13            |
| 11         | 111957515 | C   | T   | UACC257      | Cell lines | 257           | 12            |
| 11         | 111957517 | C   | T   | C021         | Cell lines | 59            | 53            |
| 11         | 111957524 | C   | T   | UACC1451     | Cell lines | 181           | 5             |
| 11         | 111957524 | C   | T   | UACC2528     | Cell lines | 138           | 5             |
| 11         | 111957524 | C   | T   | UACC952      | Cell lines | 78            | 83            |
| 11         | 111957541 | C   | T   | C021         | Cell lines | 54            | 50            |
| 11         | 111957541 | C   | T   | C077         | Cell lines | 35            | 11            |
| 11         | 111957544 | C   | T   | C077         | Cell lines | 20            | 12            |
| 11         | 111957549 | C   | T   | C025         | Cell lines | 8             | 19            |
| 11         | 111957556 | C   | T   | C088         | Cell lines | 61            | 37            |
| 11         | 111957515 | C   | T   | TCGA-EE-A29M | TCGA       | 8             | 10            |
| 11         | 111957523 | C   | T   | TCGA-D3-A51G | TCGA       | 16            | 5             |
| 11         | 111957523 | C   | T   | TCGA-D3-A8GI | TCGA       | 13            | 3             |
| 11         | 111957523 | C   | T   | TCGA-D9-A1JW | TCGA       | 11            | 7             |
| 11         | 111957523 | C   | T   | TCGA-DA-A1IC | TCGA       | 1             | 6             |
| 11         | 111957523 | C   | T   | TCGA-EE-A29D | TCGA       | 6             | 3             |
| 11         | 111957523 | C   | T   | TCGA-EE-A2GO | TCGA       | 13            | 8             |
| 11         | 111957523 | C   | T   | TCGA-EE-A3J5 | TCGA       | 8             | 3             |
| 11         | 111957523 | C   | T   | TCGA-HR-A2OG | TCGA       | 5             | 6             |
| 11         | 111957523 | C   | T   | TCGA-IH-A3EA | TCGA       | 4             | 4             |
| 11         | 111957523 | C   | T   | TCGA-W3-AA1V | TCGA       | 7             | 4             |
| 11         | 111957523 | C   | T   | TCGA-YD-A9TA | TCGA       | 3             | 6             |
| 11         | 111957530 | A   | G   | TCGA-EB-A5UL | TCGA       | 18            | 3             |
| 11         | 111957531 | C   | T   | TCGA-EE-A2GU | TCGA       | 8             | 5             |
| 11         | 111957532 | C   | A   | TCGA-D3-A2JC | TCGA       | 12            | 3             |
| 11         | 111957532 | C   | A   | TCGA-EE-A2A2 | TCGA       | 165           | 3             |
| 11         | 111957532 | C   | A   | TCGA-ER-A19B | TCGA       | 8             | 3             |
| 11         | 111957541 | C   | T   | TCGA-EE-A2MD | TCGA       | 7             | 6             |
| 11         | 111957541 | C   | T   | TCGA-EE-A2MI | TCGA       | 11            | 6             |
| 11         | 111957541 | C   | T   | TCGA-FS-A1ZK | TCGA       | 0             | 8             |
| 11         | 111957544 | C   | T   | TCGA-EE-A185 | TCGA       | 6             | 7             |
| 11         | 111957544 | C   | T   | TCGA-GN-A26C | TCGA       | 7             | 10            |
| 11         | 111957544 | C   | T   | TCGA-W3-AA1Q | TCGA       | 12            | 8             |
| 11         | 111957547 | C   | T   | TCGA-GN-A266 | TCGA       | 12            | 9             |
| 11         | 111957548 | C   | T   | TCGA-D3-A2JE | TCGA       | 21            | 8             |
| 11         | 111957548 | C   | T   | TCGA-FR-A8YC | TCGA       | 2             | 9             |
| 11         | 111957549 | C   | T   | TCGA-GN-A26C | TCGA       | 8             | 10            |
| 11         | 111957517 | C   | T   | YUPADI       | Yale       | 13            | 18            |
| 11         | 111957523 | C   | T   | YUGEN8       | Yale       | 0             | 43            |
| 11         | 111957523 | C   | T   | YURIF        | Yale       | 15            | 18            |
| 11         | 111957524 | C   | T   | YUROO        | Yale       | 16            | 23            |
| 11         | 111957535 | G   | T   | YUFOLD       | Yale       | 92            | 4             |
| 11         | 111957544 | C   | T   | YUKLAB       | Yale       | 60            | 29            |
| 11         | 111957544 | C   | T   | YURUS        | Yale       | 40            | 6             |
| 11         | 111957548 | C   | T   | YUZEAL       | Yale       | 14            | 28            |

**Supplementary Table 2. MotifBreakR results predicting the effects of recurrent *SDHD* promoter mutations (C523T, C524T, C541T, C544T, and C548T) on transcription factor binding sites.**

S2 Table. MotifBreakR results predicting the effects of recurrent *SDHD* promoter mutations (C523T, C524T, C541T, C544T and C548T) on transcription factor binding sites.

| REF | ALT | snpPos    | motifPos | geneSymbol    | dataSource | providerName     | providerId          | seqMatch          | petRef | petAlt | scoreRef | scoreAlt | Refpvalue | AltPvalue | alleleRef | alleleAlt | effect | dscore | dpct   |
|-----|-----|-----------|----------|---------------|------------|------------------|---------------------|-------------------|--------|--------|----------|----------|-----------|-----------|-----------|-----------|--------|--------|--------|
| C   | T   | 111957544 | 10       | IRF4          | HOCOMOCO   | IRF4_si          | IRF4_HUMAN          | tttcttCttccctgtt  | 0.749  | 0.931  | 8.314    | 10.276   | 2.406E-03 | 4.231E-06 | 0.001     | 0.998     | strong | 1.961  | 0.182  |
| C   | T   | 111957544 | 4        | IRF1          | HOCOMOCO   | IRF1_si          | IRF1_HUMAN          | catttctCttc       | 0.809  | 0.961  | 10.412   | 12.337   | 8.883E-04 | 2.271E-05 | 0.000     | 1.000     | strong | 1.925  | 0.152  |
| C   | T   | 111957541 | 8        | PRDM1         | HOCOMOCO   | PRDM1_fl         | PRDM1_HUMAN         | gcatttCctcttcc    | 0.734  | 0.859  | 11.437   | 13.354   | 1.073E-03 | 4.125E-05 | 0.001     | 0.994     | strong | 1.917  | 0.125  |
| C   | T   | 111957544 | 5        | IRF2          | HOCOMOCO   | IRF2_fl          | IRF2_HUMAN          | gcatttctCttc      | 0.790  | 0.934  | 10.294   | 12.135   | 8.060E-04 | 1.904E-05 | 0.000     | 0.995     | strong | 1.841  | 0.144  |
| C   | T   | 111957541 | 8        | IRF1          | HOCOMOCO   | IRF1_si          | IRF1_HUMAN          | atttCctcttcc      | 0.782  | 0.919  | 10.065   | 11.812   | 1.455E-03 | 6.670E-05 | 0.017     | 0.983     | strong | 1.747  | 0.138  |
| C   | T   | 111957541 | 9        | IRF2          | HOCOMOCO   | IRF2_fl          | IRF2_HUMAN          | catttCctcttcc     | 0.742  | 0.878  | 9.683    | 11.412   | 1.741E-03 | 7.600E-05 | 0.016     | 0.984     | strong | 1.730  | 0.135  |
| C   | T   | 111957541 | 9        | IRF3          | HOCOMOCO   | IRF3_fl          | IRF3_HUMAN          | cagcatttCctcttcc  | 0.737  | 0.879  | 8.831    | 10.474   | 1.852E-03 | 6.460E-05 | 0.018     | 0.982     | strong | 1.642  | 0.142  |
| C   | T   | 111957544 | 5        | STAT2         | HOCOMOCO   | STAT2_fl         | STAT2_HUMAN         | agcatttctCttc     | 0.760  | 0.907  | 7.258    | 8.616    | 1.963E-03 | 4.840E-05 | 0.031     | 0.928     | strong | 1.358  | 0.147  |
| C   | T   | 111957523 | 10       | IRF8          | HOCOMOCO   | IRF8_si          | IRF8_HUMAN          | gacttCcggttcaacc  | 0.748  | 0.885  | 7.629    | 8.977    | 2.225E-03 | 8.056E-05 | 0.055     | 0.945     | strong | 1.348  | 0.137  |
| C   | T   | 111957541 | 10       | IRF8          | HOCOMOCO   | IRF8_si          | IRF8_HUMAN          | catttCctcttccct   | 0.805  | 0.943  | 8.194    | 9.542    | 6.155E-04 | 1.085E-05 | 0.055     | 0.945     | strong | 1.348  | 0.137  |
| C   | T   | 111957544 | 6        | IRF8          | HOCOMOCO   | IRF8_si          | IRF8_HUMAN          | gcaattctCttc      | 0.809  | 0.933  | 8.232    | 9.447    | 5.572E-04 | 1.760E-05 | 0.030     | 0.922     | strong | 1.214  | 0.124  |
| C   | T   | 111957544 | 5        | IRF3          | HOCOMOCO   | IRF3_fl          | IRF3_HUMAN          | ccagcatttctCttc   | 0.840  | 0.943  | 10.028   | 11.218   | 1.671E-04 | 7.514E-06 | 0.041     | 0.913     | strong | 1.190  | 0.103  |
| C   | T   | 111957544 | 4        | IRF7          | HOCOMOCO   | IRF7_fl          | IRF7_HUMAN          | tttcttCttc        | 0.831  | 0.979  | 6.730    | 7.908    | 1.288E-03 | 1.240E-05 | 0.000     | 0.897     | strong | 1.178  | 0.149  |
| C   | T   | 111957541 | 14       | IRF4          | HOCOMOCO   | IRF4_si          | IRF4_HUMAN          | ttCctcttccctgttt  | 0.831  | 0.934  | 9.198    | 10.310   | 2.983E-04 | 3.393E-06 | 0.069     | 0.890     | strong | 1.113  | 0.103  |
| C   | T   | 111957544 | 4        | IRF9          | HOCOMOCO   | IRF9_fl          | IRF9_HUMAN          | catttctCttc       | 0.771  | 0.893  | 7.091    | 8.140    | 6.152E-04 | 2.259E-05 | 0.000     | 1.000     | strong | 1.049  | 0.122  |
| C   | T   | 111957541 | 9        | STAT2         | HOCOMOCO   | STAT2_fl         | STAT2_HUMAN         | gcatttCctcttccc   | 0.818  | 0.920  | 7.793    | 8.737    | 4.709E-04 | 2.864E-05 | 0.116     | 0.856     | strong | 0.944  | 0.102  |
| C   | T   | 111957523 | 9        | STAT2         | HOCOMOCO   | STAT2_fl         | STAT2_HUMAN         | cgacttCcggttcaac  | 0.788  | 0.890  | 7.512    | 8.456    | 1.041E-03 | 8.519E-05 | 0.116     | 0.856     | strong | 0.944  | 0.102  |
| C   | T   | 111957548 | 5        | FOXM1         | HOCOMOCO   | FOXM1_fl         | FOXM1_HUMAN         | cttcCctgtttt      | 0.852  | 0.920  | 4.940    | 5.312    | 4.527E-04 | 3.801E-05 | 0.000     | 0.514     | weak   | 0.372  | 0.068  |
| C   | T   | 111957544 | 8        | ETS2          | HOCOMOCO   | ETS2_si          | ETS2_HUMAN          | cctCttccctg       | 0.980  | 0.928  | 6.361    | 6.037    | 2.861E-05 | 8.788E-04 | 0.676     | 0.252     | weak   | -0.324 | -0.052 |
| C   | T   | 111957548 | 4        | PPARD         | HOCOMOCO   | PPARD_fl         | PPARD_HUMAN         | tttcttctCctg      | 0.879  | 0.813  | 7.460    | 6.930    | 3.036E-05 | 2.651E-04 | 0.770     | 0.056     | strong | -0.530 | -0.065 |
| C   | T   | 111957544 | 6        | SPI1          | HOCOMOCO   | SPI1_si          | SPI1_HUMAN          | cagcatttctCttccc  | 0.889  | 0.836  | 11.611   | 10.937   | 5.897E-06 | 5.725E-05 | 0.787     | 0.108     | weak   | -0.673 | -0.053 |
| C   | T   | 111957541 | 11       | PPARD         | HOCOMOCO   | PPARD_fl         | PPARD_HUMAN         | tttCcttccctg      | 0.879  | 0.765  | 7.460    | 6.540    | 3.036E-05 | 9.085E-04 | 0.882     | 0.062     | strong | -0.920 | -0.113 |
| C   | T   | 111957523 | 6        | ELK3          | HOCOMOCO   | ELK3_fl          | ELK3_HUMAN          | cgacttCcggtt      | 0.928  | 0.754  | 6.882    | 5.655    | 5.287E-05 | 3.725E-03 | 1.000     | 0.000     | strong | -1.227 | -0.174 |
| C   | T   | 111957524 | 5        | ELK3          | HOCOMOCO   | ELK3_fl          | ELK3_HUMAN          | cgacttCcggtt      | 0.928  | 0.754  | 6.882    | 5.655    | 5.287E-05 | 3.725E-03 | 1.000     | 0.000     | strong | -1.227 | -0.174 |
| C   | T   | 111957523 | 8        | FLI1          | HOCOMOCO   | FLI1_fl          | FLI1_HUMAN          | ttctgacttCcggttca | 0.968  | 0.785  | 6.753    | 5.520    | 1.795E-05 | 4.244E-03 | 0.924     | 0.000     | strong | -1.233 | -0.184 |
| C   | T   | 111957523 | 8        | ETV7          | HOCOMOCO   | ETV7_si          | ETV7_HUMAN          | ttctgacttCcggttca | 0.849  | 0.722  | 9.100    | 7.808    | 8.974E-05 | 1.963E-03 | 1.000     | 0.000     | strong | -1.293 | -0.127 |
| C   | T   | 111957524 | 7        | ETV7          | HOCOMOCO   | ETV7_si          | ETV7_HUMAN          | ttctgacttCcggttca | 0.849  | 0.722  | 9.100    | 7.808    | 8.974E-05 | 1.963E-03 | 1.000     | 0.000     | strong | -1.293 | -0.127 |
| C   | T   | 111957523 | 5        | ETS2          | HOCOMOCO   | ETS2_fl          | ETS2_HUMAN          | cgacttCcggtt      | 0.970  | 0.764  | 6.301    | 5.007    | 8.345E-05 | 1.436E-02 | 0.933     | 0.067     | strong | -1.294 | -0.206 |
| C   | T   | 111957548 | 4        | ETS2          | HOCOMOCO   | ETS2_fl          | ETS2_HUMAN          | ccttcttCctg       | 0.980  | 0.768  | 6.361    | 5.034    | 2.861E-05 | 1.374E-02 | 0.936     | 0.015     | strong | -1.327 | -0.212 |
| C   | T   | 111957524 | 4        | ETS2          | HOCOMOCO   | ETS2_fl          | ETS2_HUMAN          | cgacttCcggtt      | 0.970  | 0.759  | 6.301    | 4.974    | 8.345E-05 | 1.510E-02 | 0.936     | 0.015     | strong | -1.327 | -0.212 |
| C   | T   | 111957524 | 4        | ELK1          | HOCOMOCO   | ELK1_fl          | ELK1_HUMAN          | acttCcggtt        | 1.000  | 0.816  | 7.395    | 6.055    | 0.000E+00 | 3.193E-03 | 0.919     | 0.020     | strong | -1.340 | -0.184 |
| C   | T   | 111957523 | 6        | ELK4          | HOCOMOCO   | ELK4_fl          | ELK4_HUMAN          | gacttCcggtt       | 0.999  | 0.868  | 10.671   | 9.283    | 1.192E-06 | 2.401E-04 | 0.945     | 0.045     | strong | -1.388 | -0.131 |
| C   | T   | 111957524 | 7        | FLI1          | HOCOMOCO   | FLI1_fl          | FLI1_HUMAN          | ttctgacttCcggttca | 0.968  | 0.760  | 6.753    | 5.353    | 1.795E-05 | 6.113E-03 | 0.962     | 0.038     | strong | -1.400 | -0.209 |
| C   | T   | 111957541 | 4        | FEV           | HOCOMOCO   | FEV_fl           | FEV_HUMAN           | gcatttCctc        | 0.957  | 0.779  | 8.291    | 6.792    | 7.153E-05 | 3.216E-03 | 1.000     | 0.000     | strong | -1.498 | -0.178 |
| C   | T   | 111957523 | 15       | TFCP2         | HOCOMOCO   | TFCP2_fl         | TFCP2_HUMAN         | tCcggttcaaccagea  | 0.903  | 0.662  | 5.881    | 4.383    | 6.354E-05 | 2.268E-02 | 1.000     | 0.000     | strong | -1.498 | -0.242 |
| C   | T   | 111957524 | 5        | ELK4          | HOCOMOCO   | ELK4_fl          | ELK4_HUMAN          | gacttCcggtt       | 0.999  | 0.853  | 10.671   | 9.128    | 1.192E-06 | 3.133E-04 | 0.963     | 0.010     | strong | -1.544 | -0.146 |
| C   | T   | 111957524 | 3        | GABPB1+GABPB2 | HOCOMOCO   | GABPB1+GABPB2_fl | GABPB1+GABPB2_HUMAN | cgacttCcggtt      | 0.987  | 0.807  | 8.641    | 7.096    | 1.049E-05 | 2.362E-03 | 0.973     | 0.027     | strong | -1.544 | -0.180 |
| C   | T   | 111957523 | 8        | EHF           | HOCOMOCO   | EHF_si           | EHF_HUMAN           | gacttCcggttca     | 0.939  | 0.811  | 11.452   | 9.905    | 8.956E-06 | 7.288E-04 | 0.940     | 0.000     | strong | -1.547 | -0.128 |
| C   | T   | 111957523 | 5        | ELK1          | HOCOMOCO   | ELK1_fl          | ELK1_HUMAN          | acttCcggtt        | 1.000  | 0.783  | 7.395    | 5.811    | 0.000E+00 | 5.070E-03 | 0.959     | 0.013     | strong | -1.584 | -0.217 |
| C   | T   | 111957523 | 4        | GABPB1+GABPB2 | HOCOMOCO   | GABPB1+GABPB2_fl | GABPB1+GABPB2_HUMAN | cgacttCcggtt      | 0.987  | 0.780  | 8.641    | 6.865    | 1.049E-05 | 4.217E-03 | 1.000     | 0.000     | strong | -1.776 | -0.207 |
| C   | T   | 111957523 | 6        | ELF5          | HOCOMOCO   | ELF5_fl          | ELF5_HUMAN          | gacttCcggtt       | 0.952  | 0.723  | 7.604    | 5.814    | 6.890E-05 | 1.560E-02 | 1.000     | 0.000     | strong | -1.790 | -0.229 |
| C   | T   | 111957524 | 5        | ELF5          | HOCOMOCO   | ELF5_fl          | ELF5_HUMAN          | gacttCcggtt       | 0.952  | 0.723  | 7.604    | 5.814    | 6.890E-05 | 1.560E-02 | 1.000     | 0.000     | strong | -1.790 | -0.229 |
| C   | T   | 111957541 | 6        | ELF5          | HOCOMOCO   | ELF5_fl          | ELF5_HUMAN          | catttCctctt       | 0.970  | 0.742  | 7.745    | 5.955    | 2.480E-05 | 1.425E-02 | 1.000     | 0.000     | strong | -1.790 | -0.229 |
| C   | T   | 111957523 | 5        | ELF1          | HOCOMOCO   | ELF1_fl          | ELF1_HUMAN          | gacttCcggtt       | 0.997  | 0.788  | 9.083    | 7.203    | 6.676E-06 | 4.254E-03 | 1.000     | 0.000     | strong | -1.881 | -0.209 |
| C   | T   | 111957524 | 4        | ELF1          | HOCOMOCO   | ELF1_fl          | ELF1_HUMAN          | gacttCcggtt       | 0.997  | 0.788  | 9.083    | 7.203    | 6.676E-06 | 4.254E-03 | 1.000     | 0.000     | strong | -1.881 | -0.209 |
| C   | T   | 111957523 | 5        | ETS1          | HOCOMOCO   | ETS1_si          | ETS1_HUMAN          | acttCcggtt        | 0.985  | 0.743  | 7.821    | 5.925    | 1.526E-05 | 1.568E-02 | 0.996     | 0.000     | strong | -1.896 | -0.243 |
| C   | T   | 111957541 | 9        | SPI1          | HOCOMOCO   | SPI1_si          | SPI1_HUMAN          | cagcatttCctcttccc | 0.889  | 0.739  | 11.611   | 9.698    | 5.897E-06 | 1.082E-03 | 0.994     | 0.005     | strong | -1.913 | -0.150 |
| C   | T   | 111957524 | 4        | ETS1          | HOCOMOCO   | ETS1_si          | ETS1_HUMAN          | acttCcggtt        | 0.985  | 0.738  | 7.821    | 5.887    | 1.526E-05 | 1.577E-02 | 1.000     | 0.000     | strong | -1.934 | -0.247 |
| C   | T   | 111957524 | 7        | EHF           | HOCOMOCO   | EHF_si           | EHF_HUMAN           | gacttCcggttca     | 0.939  | 0.776  | 11.452   | 9.487    | 8.956E-06 | 1.537E-03 | 1.000     | 0.000     | strong | -1.966 | -0.163 |
| C   | T   | 111957523 | 5        | ERG           | HOCOMOCO   | ERG_fl           | ERG_HUMAN           | cgacttCcggtt      | 0.983  | 0.811  | 11.372   | 9.392    | 1.907E-06 | 9.186E-04 | 1.000     | 0.000     | strong | -1.980 | -0.172 |
| C   | T   | 111957524 | 4        | ERG           | HOCOMOCO   | ERG_fl           | ERG_HUMAN           | cgacttCcggtt      | 0.983  | 0.811  | 11.372   | 9.392    | 1.907E-06 | 9.186E-04 | 1.000     | 0.000     | strong | -1.980 | -0.172 |
| C   | T   | 111957523 | 7        | GABPA         | HOCOMOCO   | GABPA_fl         | GABPA_HUMAN         | cgacttCcggttca    | 0.983  | 0.820  | 12.201   | 10.205   | 3.353E-06 | 7.427E-04 | 1.000     | 0.000     | strong | -1.995 | -0.162 |
| C   | T   | 111957524 | 6        | GABPA         | HOCOMOCO   | GABPA_fl         | GABPA_HUMAN         | cgacttCcggttca    | 0.983  | 0.820  | 12.201   | 10.205   | 3.353E-06 | 7.427E-04 | 1.000     | 0.000     | strong | -1.995 | -0.162 |

Note:

REF :the reference allele for the SNP

ALT :the alternate allele for the SNP

snpPos :the coordinates of the SNP

motifPos :the coordinates of the SNP within the TF binding motif

geneSymbol :the geneSymbol corresponding to the TF of the TF binding motif

dataSource :the source of the TF binding motif

providerName, providerId :the name and id provided by the source

seqMatch :the sequence on the 5' -> 3' direction of the "+" strand that corresponds to DNA at the position that the TF binding motif was found.

pctRef :The score as determined by the scoring method, when the sequence contains the reference SNP allele, normalized to a scale from 0 - 1. If filterp = FALSE, this is the value that is thresholded.

pctAlt :The score as determined by the scoring method, when the sequence contains the alternate SNP allele, normalized to a scale from 0 - 1. If filterp = FALSE, this is the value that is thresholded.

scoreRef :The score as determined by the scoring method, when the sequence contains the reference SNP allele

scoreAlt :The score as determined by the scoring method, when the sequence contains the alternate SNP allele

Refpvalue :p-value for the match for the pctRef score, initially set to NA. see calculatePvalue for more information

Altpvalue :p-value for the match for the pctAlt score, initially set to NA. see calculatePvalue for more information

alleleRef :The proportional frequency of the reference allele at position motifPos in the motif

alleleAlt :The proportional frequency of the alternate allele at position motifPos in the motif

effect :one of weak, strong, or neutral indicating the strength of the effect.

dscore :scoreAlt-ScoreRef

dpct : pctAlt-pctRef

**Supplementary Table 3. Oligonucleotide design for quantitative mass spectrometry.**

**S3 Table. Oligonucleotide design for quantitative mass spectrometry.**

| <b>Oligo name</b> | <b>Forward</b>                                                     | <b>Reverse</b>                                                       |
|-------------------|--------------------------------------------------------------------|----------------------------------------------------------------------|
| WT_SDHD           | 5'-GTGCACCGCCTCTCGACTTCcGGTTCACCCAGCATTTCCTcTTCCTGTTTTCTTTCGTCG-3' | 5'- CGACGAAAGAAAACAGGGAAgAGgAAATGCTGGGTGAACCgGAAGTCGAGAGGCGGTGCAC-3' |
| C524T             | 5'-GTGCACCGCCTCTCGACTTCtGGTTCACCCAGCATTTCCTCTTCCTGTTTTCTTTCGTCG-3' | 5'-CGACGAAAGAAAACAGGGAAAGAGAAATGCTGGGTGAACCaGAAGTCGAGAGGCGGTGCAC-3'  |
| C541T             | 5'-GTGCACCGCCTCTCGACTTCGGTTCACCCAGCATTTCCTCTTCCTGTTTTCTTTCGTCG-3'  | 5'-CGACGAAAGAAAACAGGGAAAGAgAAATGCTGGGTGAACCgGAAGTCGAGAGGCGGTGCAC-3'  |
| C544T             | 5'-GTGCACCGCCTCTCGACTTCGGTTCACCCAGCATTTCCTtTTCCTGTTTTCTTTCGTCG-3'  | 5'- CGACGAAAGAAAACAGGGAAaAGGAAATGCTGGGTGAACCgGAAGTCGAGAGGCGGTGCAC-3' |

Design Location: chr11:111,957,504-111,957,564
